---

# The perceived impact of four funding streams on academic research production in Nordic countries: the perspectives of system actors<sup>†</sup>

Olivier Bégin-Caouette<sup>1,\*</sup>, Evanthia Kalpazidou Schmidt<sup>2</sup> and Cynthia C. Field<sup>3</sup>

<sup>1</sup>Centre interuniversitaire de recherche sur la science et la technologie (CIRST), Université du Québec à Montréal (UQÀM), C.P. 8888, Succursale Centre-ville, Montreal, Québec H3C 3P8, Canada, <sup>2</sup>Department of Political Science Danish Centre for Studies in Research and Research Policy, Aarhus University, Bartholins Allé 7, Building 1331, 030, 8000 Aarhus C, Denmark and <sup>3</sup>Department of Leadership, Adult and Higher Education, Ontario Institute for Studies in Education, University of Toronto, 252 Bloor Street West, Toronto, Ontario M5S 1V6, Canada

\*Corresponding author. Email: [olivier.begin.caouette@gmail.com](mailto:olivier.begin.caouette@gmail.com)

<sup>†</sup>An earlier version of this article was presented on 17 September 2015 to the *Atlanta Conference on Science and Innovation Policy*, organized by the School of Public Policy at Georgia Tech, Atlanta, Georgia, United States of America.

---

This article has been corrected to address an error in an author name. The correct author name is Evanthia Kalpazidou Schmidt.
